# Supplementary material for: Inmotica, primeros pasos de la domótica en hoteles
Source: MDPI journal article supplement (doi:10.3390/molecules27217568), 2005-01-01
Supplement: s1 [file s1]

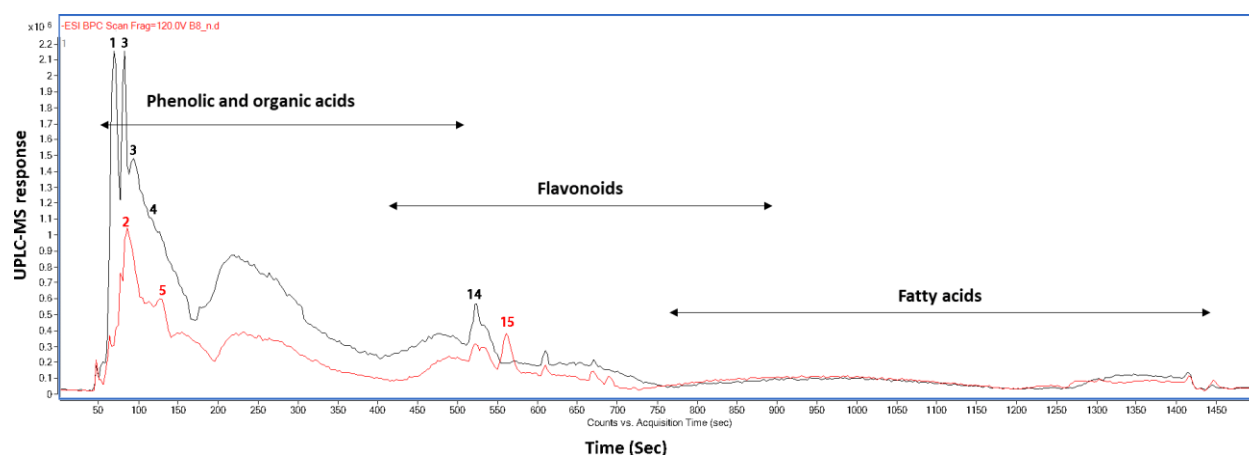

**Figure S1.** Representative UHPLC-QTOF-MS chromatogram for the negative ionization mode of *O. ficus* methanolic extract incubated with the selected microbial strains at a concentration of 5 mg/ml after 0.5 h (black) and 24 h (red), both chromatograms are characterized by three regions; (50-500 s for phenolic and organic acids, (400-900 s) for flavonoids, and (750-1450 s) for fatty acids

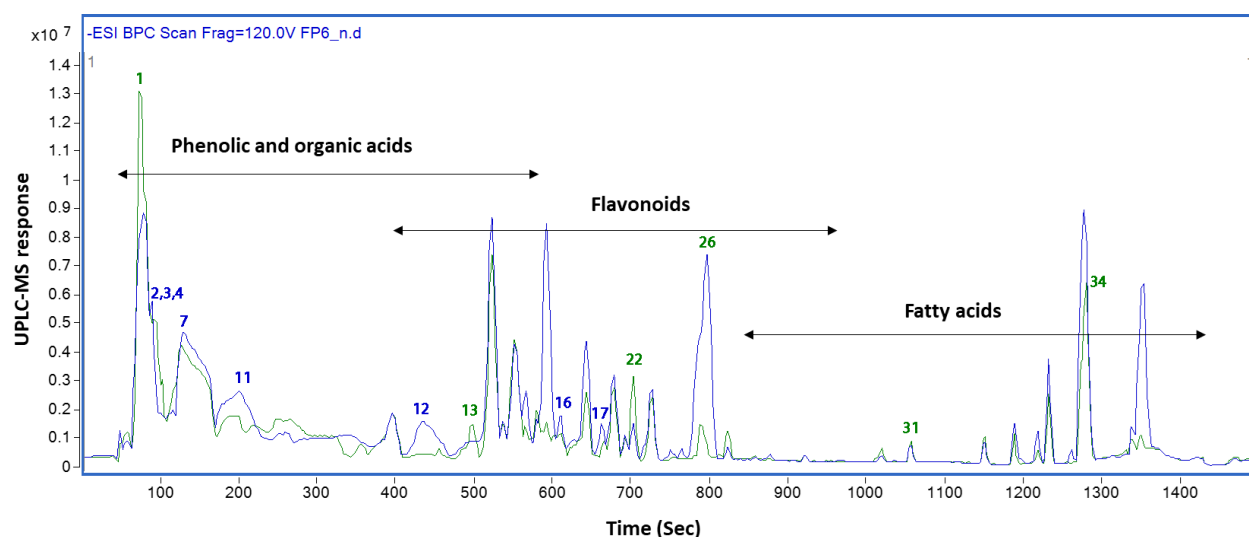

**Figure S2.** Representative UHPLC-QTOF-MS chromatogram for the negative ionization mode of untreated *O. ficus* methanolic extract (green) and treated *ex-vivo* (blue) with bacterial culture isolated from actual fecal matter at a concentration of 10 mg/ml, both chromatograms are characterized by three regions; (50-530 s for phenolic and organic acids, (400-1000 s) for flavonoids, and (710-1370 s) for fatty acids

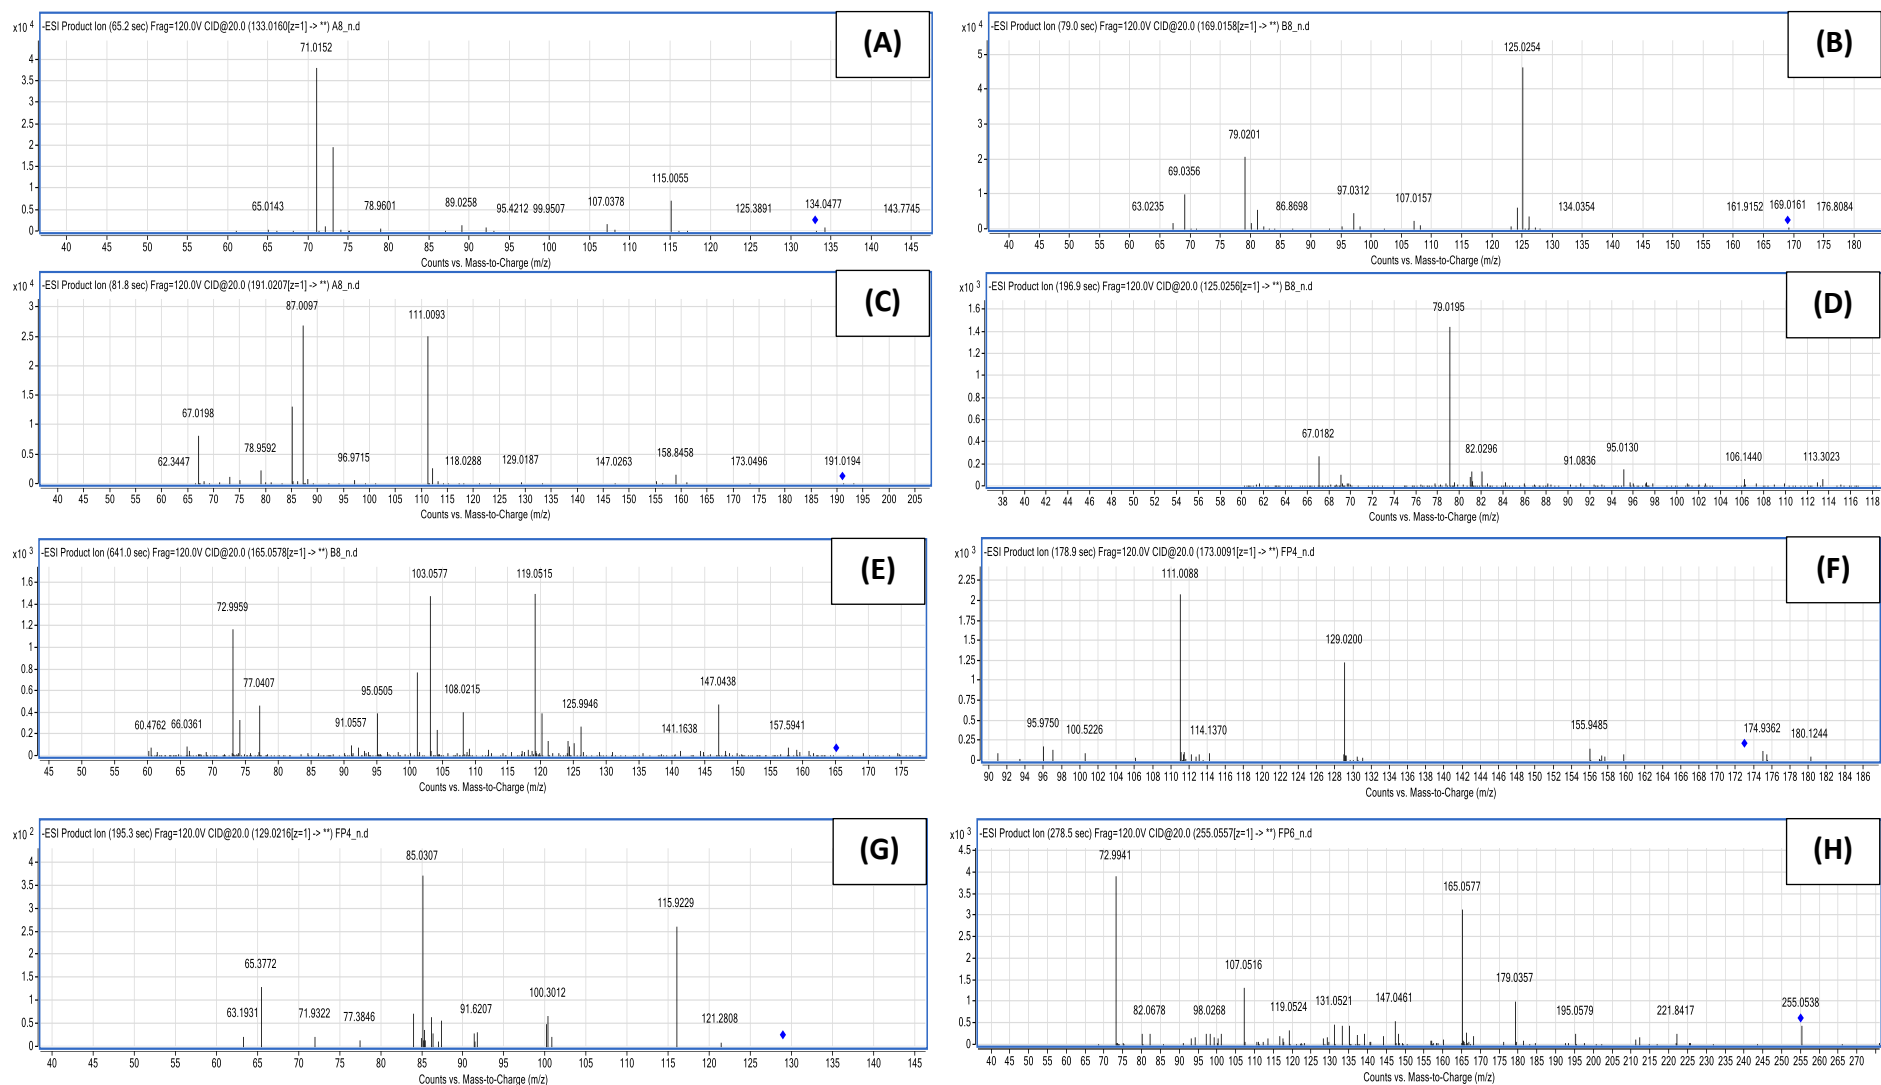

**Figure S3.** Tandem mass spectral data of some of the major metabolites studied in in vitro and ex vivo assays namely; A) Malic acid, B) Gallic acid, C) (iso)Citric acid, D) Phloroglucinol, E) 3-(4-Hydroxyphenyl) propanoic acid, F) Aconitic acid, G) Mesaconic acid, H) Piscidic acid.

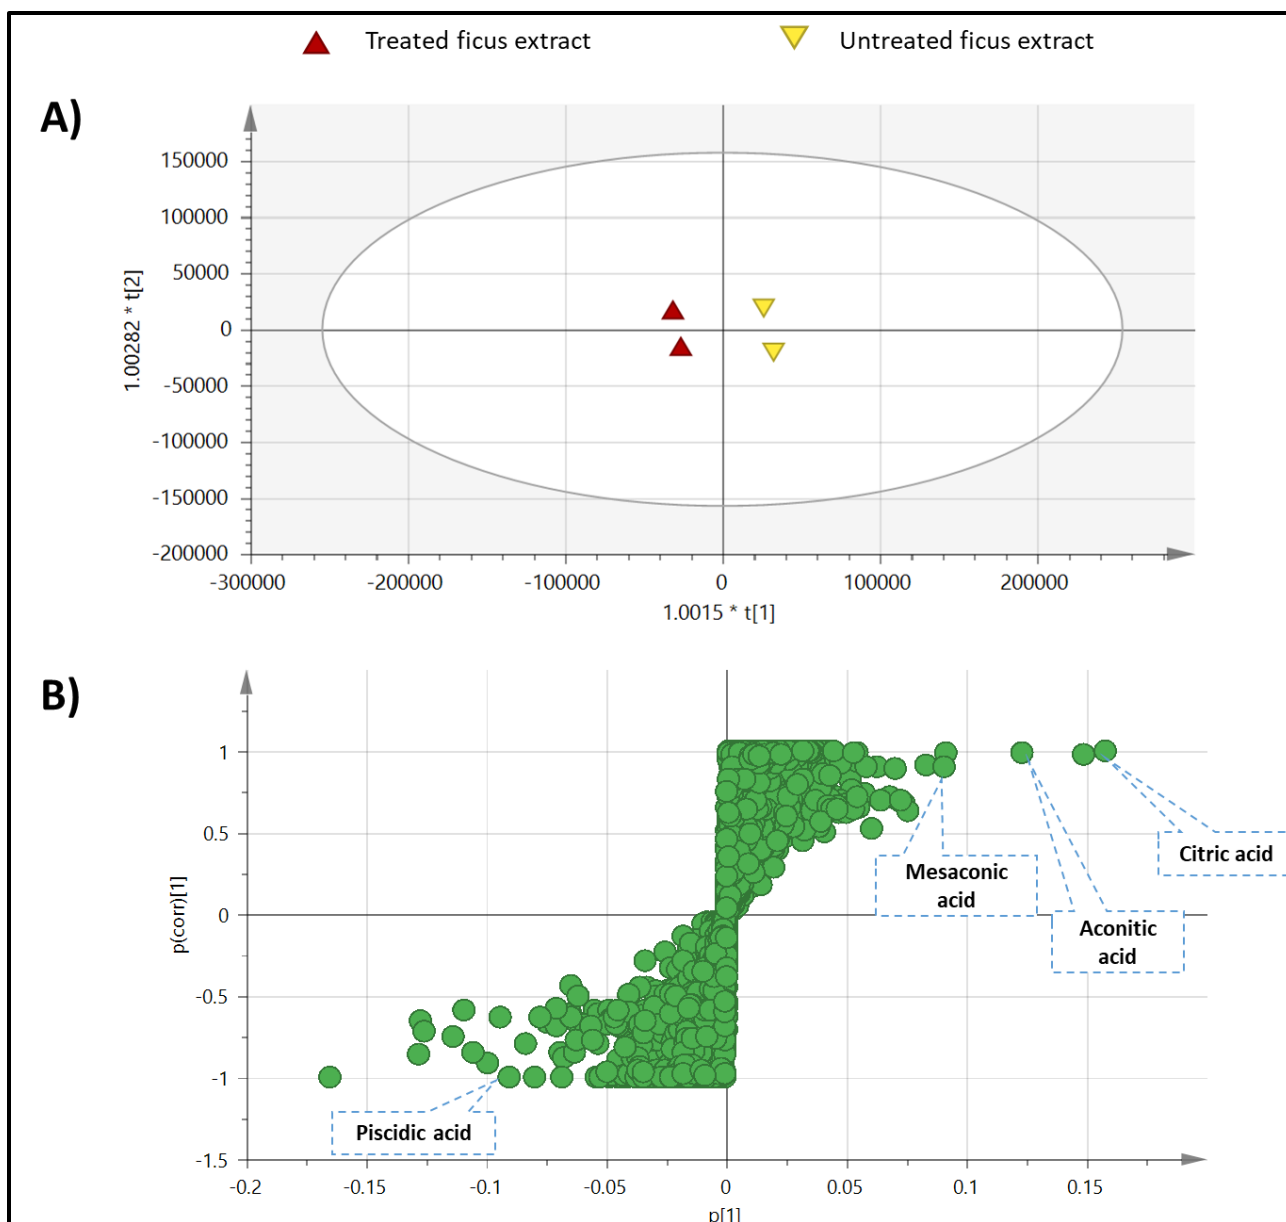

**Figure S4.** (A) OPLS model of *O. ficus* treated *ex-vivo* with gut microbiota culture isolated from fecal matter based on treatment; untreated samples (yellow) modeled against treated (red) B) S-plot of OPLS model, metabolites with positive  $p[1]$  values indicates higher abundance in untreated sample mainly; (iso)citric, aconitic and mesaconic acids, while negative  $p[1]$  indicates higher abundance within treated sample mainly; piscidic acid.

**Table S1.** Metabolites identified in *O. ficus* samples treated with gut microbiota at two time intervals; 0.5 and 24 h along with their relative abundance. Results are expressed as relative percentile (average  $\pm$  std deviation, n=3) of the total peak areas of identified metabolites.

| Peak No. | [M-H] <sup>-</sup> | Name                                              | Abundance % at 0.5 h | Abundance % at 24 h |
|----------|--------------------|---------------------------------------------------|----------------------|---------------------|
| 1        | 133.0154           | Malic acid*                                       | 9.38 $\pm$ 0.57      | 2.09 $\pm$ 1.06     |
| 2        | 169.0161           | Gallic acid*                                      | 9.2 $\pm$ 2.85       | 14.2 $\pm$ 0.36     |
| 3        | 189.0057           | (iso)Citrate*                                     | 50.79 $\pm$ 2.11     | 40.12 $\pm$ 1.96    |
| 4        | 207.0159           | Hydroxycitric acid*                               | 1.69 $\pm$ 0.11      | 1.32 $\pm$ 0.38     |
| 5        | 125.0256           | Pyrogallol*                                       | 0                    | 4.57 $\pm$ 0.73     |
| 6        | 117.0204           | Succinic acid*                                    | 7.22 $\pm$ 1.32      | 12.43 $\pm$ 3.81    |
| 7        | 125.0257           | Phloroglucinol*                                   | 0                    | 2.01 $\pm$ 0.81     |
| 8        | 205.0368           | Homocitric acid*                                  | 2.52 $\pm$ 0.18      | 0                   |
| 9        | 153.0214           | Protocatechuic acid                               | 0.11 $\pm$ 0.04      | 0                   |
| 10       | 199.0265           | Fumarylacetoacetic acid (Maleylacetoacetic acid)* | 0.8 $\pm$ 0.06       | 3.15 $\pm$ 0.33     |
| 11       | 117.0566           | Hydroxyvaleric acid*                              | 1.11 $\pm$ 0.77      | 1.95 $\pm$ 0.17     |
| 12       | 541.2307           | Isorhamnetin glycoside*                           | 2.06 $\pm$ 0.4       | 1.69 $\pm$ 0.17     |
| 13       | 219.0532           | Dimethyl citrate                                  | 9.45 $\pm$ 0.42      | 8.45 $\pm$ 0.5      |
| 14       | 183.032            | Methyl gallate                                    | 1.54 $\pm$ 0.03      | 1.01 $\pm$ 0.04     |
| 15       | 165.0585           | 3-(4-Hydroxyphenyl) propanoic acid*               | 0                    | 3.57 $\pm$ 0.704    |
| 16       | 563.1102           | Kaempferol*                                       | 0                    | 0.13 $\pm$ 0.01     |
| 17       | 301.0387           | Quercetin glycoside                               | 0.45 $\pm$ 0.07      | 0.22 $\pm$ 0.03     |
| 18       | 349.0618           | Ethyl gallate derivative                          | 0.12 $\pm$ 0.01      | 0                   |
| 19       | 285.043            | Quercetin                                         | 0.26 $\pm$ 0.01      | 0.48 $\pm$ 0.07     |
| 20       | 271.0627           | Naringenin                                        | 0.11 $\pm$ 0.01      | 0                   |
| 21       | 287.2249           | Dihydroxyhexadecanoic acid*                       | 0.05 $\pm$ 0.01      | 0.11 $\pm$ 0.01     |
| 22       | 443.1753           | Trihydroxyoctadecenoic acid derivative            | 0.12 $\pm$ 0.01      | 0.07 $\pm$ 0.01     |
| 23       | 329.2358           | Trihydroxyoctadecenoic acid*                      | 0                    | 0.15 $\pm$ 0.01     |
| 24       | 663.2948           | Dihydroxyhexadecanoic acid derivative*            | 0.69 $\pm$ 0.05      | 0                   |
| 25       | 547.2805           | Dihydroxyhexadecanoic acid derivative             | 0.29 $\pm$ 0.02      | 0.11 $\pm$ 0.01     |
| 26       | 269.0472           | Apigenin                                          | 0.41 $\pm$ 0.04      | 0.88 $\pm$ 0.05     |
| 27       | 299.0597           | Diosmetin*                                        | 0.08 $\pm$ 0.01      | 0                   |
| 28       | 283.0643           | Acacetin*                                         | 0.12 $\pm$ 0.01      | 0                   |
| 29       | 277.1822           | Panaxatriol                                       | 0                    | 0.49 $\pm$ 0.07     |
| 30       | 483.3161           | Palmitic acid derivative                          | 0.05 $\pm$ 0.01      | 0                   |
| 31       | 239.0701           | Hydroxyflavanone*                                 | 0.05 $\pm$ 0.01      | 0                   |
| 32       | 295.2301           | Hydroxylinoleic acid                              | 0.15 $\pm$ 0.03      | 0                   |
| 33       | 243.1984           | Hydroxytetradecanoic acid                         | 0.077 $\pm$ 0.019    | 0                   |
| 34       | 271.2278           | Hydroxyhexadecanoic acid                          | 0.14 $\pm$ 0.01      | 0.39 $\pm$ 0.06     |
| 35       | 471.3509           | Hydroxybetulinic acid                             | 0.06 $\pm$ 0.01      | 0                   |

| Peak No.  | [M-H] <sup>-</sup> | Name                                 | Abundance<br>% at 0.5 h | Abundance<br>% at 24 h |
|-----------|--------------------|--------------------------------------|-------------------------|------------------------|
| <b>36</b> | 253.2196           | Palmitoleic acid (Hexadecenoic acid) | 0.02±0.01               | 0                      |
| <b>37</b> | 279.2351           | Linoleic acid*                       | 0.25±0.02               | 0                      |
| <b>38</b> | 255.2355           | Palmitic acid (Hexadecanoic acid)    | 0.09±0.02               | 0.22±0.04              |
| <b>39</b> | 281.2521           | Oleic acid*                          | 0.34±0.01               | 0                      |

\* Denotes metabolites that showed significant difference when analyzed using paired t test (p value < 0.05)

**Table S2.** Metabolites identified in *O. ficus* samples; untreated and treated with ex vivo culture of the human gut microbiome isolated from fecal matter along with their relative abundance

| Peak No. | [M-H] <sup>-</sup> | Rt (sec) | Molecular Formula                              | Error (ppm) | MS/MS                       | Name                | Class         | Untreated <i>O. ficus</i> sample | <i>O. ficus</i> treated with culture of the human gut microbiome |
|----------|--------------------|----------|------------------------------------------------|-------------|-----------------------------|---------------------|---------------|----------------------------------|------------------------------------------------------------------|
| 1        | 195.0504           | 66       | C <sub>6</sub> H <sub>12</sub> O <sub>7</sub>  | 3.19        | 177.01, 133.03              | Gluconic acid       | Organic acids | ++                               | +                                                                |
| 2        | 353.0862           | 83       | C <sub>16</sub> H <sub>18</sub> O <sub>9</sub> | 4.53        | 191.01                      | Caffeoylquinic acid | Phenolic acid | +                                | -                                                                |
| 3        | 73.0311            | 97       | C <sub>3</sub> H <sub>6</sub> O <sub>2</sub>   | -8.2        | -                           | Propionic acid      | SCFA          | -                                | +                                                                |
| 4        | 133.0137           | 98       | C <sub>4</sub> H <sub>6</sub> O <sub>5</sub>   | 4.08        | 115, 71.01                  | Malic acid          | Organic acid  | +                                | -                                                                |
| 5        | 205.0356           | 101      | C <sub>7</sub> H <sub>10</sub> O <sub>7</sub>  | -1.09       | 191.05, 127, 111.01         | Homocitric acid     | Organic acid  | ++                               | +                                                                |
| 6        | 191.0193           | 110      | C <sub>6</sub> H <sub>8</sub> O <sub>7</sub>   | 3.26        | 171.03, 127, 111, 99, 83.01 | (iso)citric acid    | Organic acid  | +                                | -                                                                |
| 7        | 117.0211           | 126      | C <sub>4</sub> H <sub>6</sub> O <sub>4</sub>   | -14.98      | 73.03                       | Succinic acid       | Organic acid  | -                                | +                                                                |
| 8        | 173.0091           | 180      | C <sub>6</sub> H <sub>6</sub> O <sub>6</sub>   | -16.89      | 129.02, 111.01, 85.03       | Aconitic acid       | Organic acid  | ++                               | +                                                                |
| 9        | 129.0216           | 188      | C <sub>5</sub> H <sub>6</sub> O <sub>4</sub>   | 2.56        | 85.05                       | Mesaconic acid      | Organic acid  | +                                | -                                                                |
| 10       | 147.0454           | 190      | C <sub>9</sub> H <sub>8</sub> O <sub>2</sub>   | -1.67       | 129.01, 103.03, 85.01       | Cinnamic acid       | Phenolic acid | ++                               | +                                                                |

| Peak No. | [M-H] <sup>-</sup> | Rt (sec) | Molecular Formula                               | Error (ppm) | MS/MS                          | Name                                        | Class         | Untreated <i>O. ficus</i> sample | <i>O. ficus</i> treated with culture of the human gut microbiome |
|----------|--------------------|----------|-------------------------------------------------|-------------|--------------------------------|---------------------------------------------|---------------|----------------------------------|------------------------------------------------------------------|
| 11       | 255.0557           | 268      | C <sub>11</sub> H <sub>12</sub> O <sub>7</sub>  | -0.29       | 165.05, 119.05, 107.05         | Piscidic acid                               | Phenolic acid | +                                | ++                                                               |
| 12       | 117.0557           | 412      | C <sub>5</sub> H <sub>10</sub> O <sub>3</sub>   | 0.15        | 99.02                          | Hydroxypentanoic acid (hydroxyvaleric acid) | SCFA          | +                                | ++                                                               |
| 13       | 431.1043           | 508      | C <sub>21</sub> H <sub>20</sub> O <sub>10</sub> | -13.72      | 285.11                         | Kaempferol rhamnoside                       | Flavonoids    | +                                | -                                                                |
| 14       | 331.0681           | 527      | C <sub>13</sub> H <sub>16</sub> O <sub>10</sub> | -3.1        | 169.01                         | Galloylglucose                              | Phenolics     | +                                | -                                                                |
| 15       | 473.2102           | 602      | C <sub>22</sub> H <sub>34</sub> O <sub>11</sub> | -13.21      | 301.11, 179.07, 151            | Quercetin glycoside                         | Flavonoids    | ++                               | +                                                                |
| 16       | 285.0376           | 616      | C <sub>15</sub> H <sub>10</sub> O <sub>6</sub>  | 10          | 268.03, 243.03, 195.04, 169.06 | Kaempferol                                  | Flavonoids    | -                                | +                                                                |
| 17       | 165.0592           | 643      | C <sub>9</sub> H <sub>10</sub> O <sub>3</sub>   | -14.97      | 147.03, 119.05, 91.01          | 3-(4-Hydroxyphenyl) propanoic acid          | Phenolics     | -                                | +                                                                |
| 18       | 423.0918           | 652      | C <sub>19</sub> H <sub>20</sub> O <sub>11</sub> | 3.5         | 331.09, 169.01                 | Galloylarbutin                              | Phenolics     | +                                | -                                                                |
| 19       | 609.1450           | 673      | C <sub>27</sub> H <sub>30</sub> O <sub>16</sub> | 10.01       | 447.01, 315.15                 | Isorhamnetin-O-pentosyl-hexoside            | Flavonoids    | +                                | -                                                                |
| 20       | 445.0502           | 674      | C <sub>20</sub> H <sub>14</sub> O <sub>12</sub> | 14.14       | 301.14, 179.07, 151            | Quercetin glycoside                         | Flavonoids    | ++                               | +                                                                |
| 21       | 437.1138           | 695      | C <sub>20</sub> H <sub>22</sub> O <sub>11</sub> | 11.1        | 331.01, 169.01                 | Galloylglucose derivative                   | Phenolics     | +                                | -                                                                |
| 22       | 443.1824           | 709      | C <sub>17</sub> H <sub>32</sub> O <sub>13</sub> | -12.12      | 329.23, 133.01, 71.01          | Trihydroxyoctadecenoic acid derivative      | Fatty acids   | ++                               | +                                                                |

| Peak No. | [M-H] <sup>-</sup> | Rt (sec) | Molecular Formula                               | Error (ppm) | MS/MS                                  | Name                                   | Class       | Untreated <i>O. ficus</i> sample | <i>O. ficus</i> treated with culture of the human gut microbiome |
|----------|--------------------|----------|-------------------------------------------------|-------------|----------------------------------------|----------------------------------------|-------------|----------------------------------|------------------------------------------------------------------|
| 23       | 541.2636           | 725      | C <sub>26</sub> H <sub>38</sub> O <sub>12</sub> | 3.39        | 315.11                                 | Isorhamnetin glycoside                 | Flavonoids  | ++                               | +                                                                |
| 24       | 785.2930           | 746      | C <sub>29</sub> H <sub>54</sub> O <sub>24</sub> | 0.29        | 315.29                                 | Isorhamnetin glycoside                 | Flavonoids  | +                                | -                                                                |
| 25       | 477.0217           | 787      | C <sub>20</sub> H <sub>14</sub> O <sub>14</sub> | 12.09       | 331.01, 169.01                         | Galloylglucose derivative              | Phenolics   | +                                | -                                                                |
| 26       | 329.2304           | 823      | C <sub>18</sub> H <sub>34</sub> O <sub>5</sub>  | 8.43        | 133.01, 71.01                          | Trihydroxyoctadecenoic acid            | Fatty acids | +                                | ++                                                               |
| 27       | 533.2029           | 824      | C <sub>27</sub> H <sub>34</sub> O <sub>11</sub> | -0.83       | 329.23                                 | Trihydroxyoctadecenoic acid derivative | Fatty acids | ++                               | +                                                                |
| 28       | 301.0327           | 863      | C <sub>15</sub> H <sub>10</sub> O <sub>7</sub>  | 8.86        | 179.07, 151                            | Quercetin                              | Flavonoids  | -                                | +                                                                |
| 29       | 235.1736           | 945      | C <sub>15</sub> H <sub>24</sub> O <sub>2</sub>  | -13.95      | 217.17, 191.01                         | Farnesoic acid                         | Fatty acids | +                                | -                                                                |
| 30       | 271.0641           | 1015     | C <sub>15</sub> H <sub>12</sub> O <sub>5</sub>  | -10.67      | 253.15, 209.36, 177.37, 151.01, 119.04 | Naringenin                             | Flavonoids  | -                                | +                                                                |
| 31       | 295.2328           | 1057     | C <sub>18</sub> H <sub>32</sub> O <sub>3</sub>  | -16.65      | 277.21, 251, 183.13                    | Hydroxylinoleic acid                   | Fatty acids | ++                               | +                                                                |
| 32       | 281.2513           | 1156     | C <sub>18</sub> H <sub>34</sub> O <sub>2</sub>  | -9.55       | 237.03, 171.1                          | Oleic acid                             | Fatty acids | +                                | -                                                                |
| 33       | 279.2364           | 1223     | C <sub>18</sub> H <sub>32</sub> O <sub>2</sub>  | -12.3       | 237.09, 187.01                         | Linoleic acid                          | Fatty acids | ++                               | +                                                                |
| 34       | 323.226            | 1272     | C <sub>19</sub> H <sub>32</sub> O <sub>4</sub>  | -9.83       | 255.23                                 | Palmitic acid derivative               | Fatty acids | +                                | -                                                                |

\* ++, +, -; reflects the metabolite relative abundance as depicted from the peak abundance data extracted from MS-DIAL, (++) increased abundance, (+) present, (-) absent

**Table S3.** Metabolites identified in *O. ficus* untreated and treated ex-vivo with actual fecal matter samples along with their relative abundance. Results are expressed as relative percentile (average  $\pm$  std deviation, n=3) of the total peak areas of identified metabolites.

| Peak No. | [M-H] <sup>-</sup> | Name                                    | Abundance % at untreated sample | Abundance % at treated sample |
|----------|--------------------|-----------------------------------------|---------------------------------|-------------------------------|
| 1        | 195.0504           | Gluconic acid*                          | 2.72 $\pm$ 0.12                 | 1.26 $\pm$ 0.05               |
| 2        | 353.0862           | Caffeoylquinic acid                     | 0.65 $\pm$ 0.01                 | 0.15 $\pm$ 0.01               |
| 3        | 73.0311            | Propionic acid*                         | 0                               | 1.43 $\pm$ 0.02               |
| 4        | 133.0137           | Malic acid*                             | 7.75 $\pm$ 0.01                 | 1.81 $\pm$ 0.01               |
| 5        | 205.0356           | Homocitric acid*                        | 2.95 $\pm$ 0.51                 | 0.71 $\pm$ 0.01               |
| 6        | 191.0193           | Citric acid*                            | 32.52 $\pm$ 0.9                 | 0.56 $\pm$ 0.03               |
| 7        | 117.0211           | Succinic acid*                          | 0.69 $\pm$ 0.3                  | 37.96 $\pm$ 0.93              |
| 8        | 173.0121           | Aconitic acid*                          | 19.73 $\pm$ 0.08                | 0.31 $\pm$ 0.0                |
| 9        | 129.0190           | Mesaconic acid*                         | 6.92 $\pm$ 0.41                 | 0.11 $\pm$ 0.0                |
| 10       | 147.0454           | Cinnamic acid*                          | 1.37 $\pm$ 0.01                 | 0.41 $\pm$ 0.0                |
| 11       | 255.0511           | Piscidic acid*                          | 2.34 $\pm$ 0.03                 | 29.76 $\pm$ 0.87              |
| 12       | 117.0557           | Hydroxypentanoic acid*                  | 0.24 $\pm$ 0.0                  | 1.99 $\pm$ 0.01               |
| 13       | 431.1043           | Kaempferol rhamnoside*                  | 1.11 $\pm$ 0.06                 | 0.03 $\pm$ 0.0                |
| 14       | 331.0681           | Galloylglucose*                         | 0.31 $\pm$ 0.01                 | 0                             |
| 15       | 473.2102           | Quercetin glycoside*                    | 1.82 $\pm$ 0.03                 | 0.07 $\pm$ 0.0                |
| 16       | 285.0242           | Kaempferol*                             | 0                               | 2.69 $\pm$ 0.07               |
| 17       | 165.0592           | 3-(4-Hydroxyphenyl) propanoic acid*     | 0                               | 2.31 $\pm$ 0.02               |
| 18       | 423.0918           | Galloylarbutin                          | 0.61 $\pm$ 0.02                 | 0.03 $\pm$ 0.0                |
| 19       | 609.1450           | Isorhamnetin-O-pentosyl-hexoside        | 0.21 $\pm$ 0.01                 | 0                             |
| 21       | 437.1138           | Galloylglucose derivative*              | 1.26 $\pm$ 0.05                 | 0.15 $\pm$ 0.01               |
| 21       | 445.0502           | Quercetin glycoside*                    | 2.63 $\pm$ 0.01                 | 0.18 $\pm$ 0.02               |
| 22       | 443.1824           | Trihydroxyoctadecenoic acid derivative* | 1.87 $\pm$ 0.05                 | 0                             |
| 25       | 477.0217           | Galloylglucose derivative*              | 1.05 $\pm$ 0.05                 | 0.22 $\pm$ 0.01               |
| 26       | 329.2304           | Trihydroxyoctadecenoic acid*            | 0.58 $\pm$ 0.05                 | 4.22 $\pm$ 0.01               |
| 27       | 541.2636           | Isorhamnetin glycoside*                 | 2.77 $\pm$ 0.12                 | 0.26 $\pm$ 0.01               |
| 27       | 533.2029           | Trihydroxyoctadecenoic acid derivative  | 0.38 $\pm$ 0.01                 | 0.15 $\pm$ 0.0                |
| 28       | 785.2930           | Isorhamnetin glycoside*                 | 2.31 $\pm$ 0.09                 | 0.45 $\pm$ 0.02               |
| 29       | 301.0327           | Quercetin*                              | 0.13 $\pm$ 0.01                 | 3.16 $\pm$ 0.02               |
| 29       | 235.1736           | Farnesoic acid                          | 0.24 $\pm$ 0.03                 | 0.03 $\pm$ 0.0                |
| 31       | 295.2328           | Hydroxylinoleic acid*                   | 2.01 $\pm$ 0.02                 | 0.26 $\pm$ 0.01               |
| 32       | 271.0641           | Naringenin*                             | 0.11 $\pm$ 0.02                 | 3.62 $\pm$ 0.02               |
| 32       | 281.2513           | Oleic acid*                             | 1.11 $\pm$ 0.07                 | 0                             |

| Peak No. | [M-H] <sup>-</sup> | Name                      | Abundance<br>% at<br>untreated<br>sample | Abundance<br>% at<br>treated<br>sample |
|----------|--------------------|---------------------------|------------------------------------------|----------------------------------------|
| 33       | 279.2364           | Linoleic acid             | 0.83±0.03                                | 0.15±0.0                               |
| 34       | 323.226            | Palmitic acid derivative* | 0.92±0.05                                | 0                                      |

\* Denotes metabolites that showed significant difference when analyzed using paired t test (p value < 0.05)
